# Supplementary material for: New different origins and evolutionary processes of AP2/EREBP transcription factors in Taxus chinensis
Source: PubMed Central journal article supplement (PMC6781369; doi:10.1186/s12870-019-2044-z), 2019-10-07
Supplement: 12870_2019_2044_MOESM2_ESM.pdf [file 12870_2019_2044_MOESM2_ESM.pdf]

|      |                                                                             |      |      |      |      |      |
|------|-----------------------------------------------------------------------------|------|------|------|------|------|
|      | 670                                                                         | 680  | 690  | 700  | 710  | 720  |
| 661  | GTCTCGAAGGAAGAATACCTGGCTTCTCTCAGGAGA <b>AGAAGCAGCGGTTTCTCAAGAGGA</b>        |      |      |      |      |      |
| 221  | V S K E E Y L A S L R R R S <b>S G F S R G</b>                              |      |      |      |      |      |
|      | 730                                                                         | 740  | 750  | 760  | 770  | 780  |
| 721  | <b>GTTTCAAAGTACCGCGGTGTGGCAAGACATCATCACAATGGACGCTGGGAAGCACGAATT</b>         |      |      |      |      |      |
| 241  | <b>V S K Y R G V A R H H H N G R W E A R I</b>                              |      |      |      |      |      |
|      | 790                                                                         | 800  | 810  | 820  | 830  | 840  |
| 781  | <b>GGCCGTGTGTTTGGCAATAAGTATCTCTACTTGGGAACCTACAGCACCCAAGAAGAAGCA</b>         |      |      |      |      |      |
| 261  | <b>G R V F G N K Y L Y L G T Y S T Q E E A</b>                              |      |      |      |      |      |
|      | 850                                                                         | 860  | 870  | 880  | 890  | 900  |
| 841  | <b>GCCGCAGCCTACGACATGGCCGCATAGAATACAGAGGC</b> <b>TAAACGCTGTGACAAACTTT</b>   |      |      |      |      |      |
| 281  | <b>A A A Y D M A A I E Y R G L N A V T N F</b>                              |      |      |      |      |      |
|      | 910                                                                         | 920  | 930  | 940  | 950  | 960  |
| 901  | <b>GATTTGAGTCGCTACATAGGA</b> <b>AGAAGCAGCGGTTTCTCAAGAGGAGTTTCAAAGTACCGC</b> |      |      |      |      |      |
| 301  | <b>D L S R Y I G R S S G F S R G V S K Y R</b>                              |      |      |      |      |      |
|      | 970                                                                         | 980  | 990  | 1000 | 1010 | 1020 |
| 961  | <b>GGTGTGGCAAGACATCATCACAATGGACGCTGGGAAGCACGAATTGGCCGTGTGTTTGGC</b>         |      |      |      |      |      |
| 321  | <b>G V A R H H H N G R W E A R I G R V F G</b>                              |      |      |      |      |      |
|      | 1030                                                                        | 1040 | 1050 | 1060 | 1070 | 1080 |
| 1021 | <b>AATAAGTATCTCTACTTGGGAACCTACAGCACCCAAGAAGAAGCAGCCGCAGCCTACGAC</b>         |      |      |      |      |      |
| 341  | <b>N K Y L Y L G T Y S T Q E E A A A A Y D</b>                              |      |      |      |      |      |
|      | 1090                                                                        | 1100 | 1110 | 1120 | 1130 | 1140 |
| 1081 | <b>ATGGCCGCATAGAATACAGAGGC</b> <b>TAAACGCTGTGACAAACTTTGATTTGAGTCGCTAC</b>   |      |      |      |      |      |
| 361  | <b>M A A I E Y R G L N A V T N F D L S R Y I</b>                            |      |      |      |      |      |
|      | 1150                                                                        | 1160 | 1170 | 1180 | 1190 | 1200 |
| 1141 | <b>ATAGGGTGGCTAAGACCCGGCCAAAACACTAGTTCAAGTGATCAGGAATCAGGATCGAGT</b>         |      |      |      |      |      |
| 381  | <b>G W L R P G Q N T S S S D Q E S G S S</b>                                |      |      |      |      |      |
